# Supplementary material
Source: HighWire-hosted journal article supplement (https://www.cfp.ca/highwire/filestream/30438/field_highwire_adjunct_files/2/PCC__Form_Men.pdf)
Supplement: PCC__Form_Men.pdf [file PCC__Form_Men.pdf]

# Preventive Care Checklist Form<sup>®</sup>

## For average-risk, routine, male health assessments

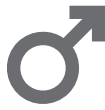

Developed by: Dr. V. Dubey, Dr. R. Mathew, Dr. K. Iglar  
Revised by: Dr. A. Ischayek, Dr. J. Ridley

**Please note:**

**Bold** = Grade A, or strong evidence (from the Canadian Task Force on Preventive Health Care)  
*Italics* = Grade B, or weak evidence (from the Canadian Task Force on Preventive Health Care)  
Plain text = Guidelines (from other Canadian sources)

(See reverse for references, insert for explanations)

Name:

Sex:

DOB:

Age:

Health Card:

Tel:

Address:

Date:

|                                                                                                                                                                                                                                                          |                                                                                                                                                                                                                                                                                                                                                       |
|----------------------------------------------------------------------------------------------------------------------------------------------------------------------------------------------------------------------------------------------------------|-------------------------------------------------------------------------------------------------------------------------------------------------------------------------------------------------------------------------------------------------------------------------------------------------------------------------------------------------------|
| <h3>Current Concerns</h3>                                                                                                                                                                                                                                | <h3>Lifestyle/Habits</h3> <p>Diet: <i>Fat/Cholesterol</i><br/>Fiber<br/><i>Calcium</i><br/>Sodium</p> <p>Exercise:</p> <p>Work/Education:</p> <p>Poverty:</p> <p>Family:</p> <p>Relationships:</p> <p><i>Smoking:</i></p> <p><i>Alcohol:</i></p> <p>Drugs:</p> <p><i>Sexual History:</i></p> <p>Family Planning/<br/>Contraception:</p> <p>Sleep:</p> |
| <h3>Update Cumulative Patient Profile</h3> <p><input type="checkbox"/> Family History                      <input type="checkbox"/> Medications</p> <p><input type="checkbox"/> Hospitalizations/Surgeries        <input type="checkbox"/> Allergies</p> |                                                                                                                                                                                                                                                                                                                                                       |

| <h3>Functional Inquiry</h3> <table border="1"> <thead> <tr> <th>Normal</th> <th>Remarks</th> </tr> </thead> <tbody> <tr> <td>HEENT: <input type="checkbox"/></td> <td></td> </tr> <tr> <td>CVS: <input type="checkbox"/></td> <td></td> </tr> <tr> <td>Resp: <input type="checkbox"/></td> <td></td> </tr> <tr> <td>GI: <input type="checkbox"/></td> <td></td> </tr> <tr> <td>GU: <input type="checkbox"/></td> <td></td> </tr> <tr> <td>Sexual Function: <input type="checkbox"/></td> <td></td> </tr> </tbody> </table> | Normal  | Remarks | HEENT: <input type="checkbox"/> |  | CVS: <input type="checkbox"/> |  | Resp: <input type="checkbox"/> |  | GI: <input type="checkbox"/> |  | GU: <input type="checkbox"/> |  | Sexual Function: <input type="checkbox"/> |  | <table border="1"> <thead> <tr> <th>Normal</th> <th>Remarks</th> </tr> </thead> <tbody> <tr> <td>MSK: <input type="checkbox"/></td> <td></td> </tr> <tr> <td>Neuro: <input type="checkbox"/></td> <td></td> </tr> <tr> <td>Derm: <input type="checkbox"/></td> <td></td> </tr> <tr> <td>Mental Health: <input type="checkbox"/></td> <td></td> </tr> <tr> <td>Constitutional SX: <input type="checkbox"/></td> <td></td> </tr> </tbody> </table> | Normal | Remarks | MSK: <input type="checkbox"/> |  | Neuro: <input type="checkbox"/> |  | Derm: <input type="checkbox"/> |  | Mental Health: <input type="checkbox"/> |  | Constitutional SX: <input type="checkbox"/> |  |
|----------------------------------------------------------------------------------------------------------------------------------------------------------------------------------------------------------------------------------------------------------------------------------------------------------------------------------------------------------------------------------------------------------------------------------------------------------------------------------------------------------------------------|---------|---------|---------------------------------|--|-------------------------------|--|--------------------------------|--|------------------------------|--|------------------------------|--|-------------------------------------------|--|--------------------------------------------------------------------------------------------------------------------------------------------------------------------------------------------------------------------------------------------------------------------------------------------------------------------------------------------------------------------------------------------------------------------------------------------------|--------|---------|-------------------------------|--|---------------------------------|--|--------------------------------|--|-----------------------------------------|--|---------------------------------------------|--|
| Normal                                                                                                                                                                                                                                                                                                                                                                                                                                                                                                                     | Remarks |         |                                 |  |                               |  |                                |  |                              |  |                              |  |                                           |  |                                                                                                                                                                                                                                                                                                                                                                                                                                                  |        |         |                               |  |                                 |  |                                |  |                                         |  |                                             |  |
| HEENT: <input type="checkbox"/>                                                                                                                                                                                                                                                                                                                                                                                                                                                                                            |         |         |                                 |  |                               |  |                                |  |                              |  |                              |  |                                           |  |                                                                                                                                                                                                                                                                                                                                                                                                                                                  |        |         |                               |  |                                 |  |                                |  |                                         |  |                                             |  |
| CVS: <input type="checkbox"/>                                                                                                                                                                                                                                                                                                                                                                                                                                                                                              |         |         |                                 |  |                               |  |                                |  |                              |  |                              |  |                                           |  |                                                                                                                                                                                                                                                                                                                                                                                                                                                  |        |         |                               |  |                                 |  |                                |  |                                         |  |                                             |  |
| Resp: <input type="checkbox"/>                                                                                                                                                                                                                                                                                                                                                                                                                                                                                             |         |         |                                 |  |                               |  |                                |  |                              |  |                              |  |                                           |  |                                                                                                                                                                                                                                                                                                                                                                                                                                                  |        |         |                               |  |                                 |  |                                |  |                                         |  |                                             |  |
| GI: <input type="checkbox"/>                                                                                                                                                                                                                                                                                                                                                                                                                                                                                               |         |         |                                 |  |                               |  |                                |  |                              |  |                              |  |                                           |  |                                                                                                                                                                                                                                                                                                                                                                                                                                                  |        |         |                               |  |                                 |  |                                |  |                                         |  |                                             |  |
| GU: <input type="checkbox"/>                                                                                                                                                                                                                                                                                                                                                                                                                                                                                               |         |         |                                 |  |                               |  |                                |  |                              |  |                              |  |                                           |  |                                                                                                                                                                                                                                                                                                                                                                                                                                                  |        |         |                               |  |                                 |  |                                |  |                                         |  |                                             |  |
| Sexual Function: <input type="checkbox"/>                                                                                                                                                                                                                                                                                                                                                                                                                                                                                  |         |         |                                 |  |                               |  |                                |  |                              |  |                              |  |                                           |  |                                                                                                                                                                                                                                                                                                                                                                                                                                                  |        |         |                               |  |                                 |  |                                |  |                                         |  |                                             |  |
| Normal                                                                                                                                                                                                                                                                                                                                                                                                                                                                                                                     | Remarks |         |                                 |  |                               |  |                                |  |                              |  |                              |  |                                           |  |                                                                                                                                                                                                                                                                                                                                                                                                                                                  |        |         |                               |  |                                 |  |                                |  |                                         |  |                                             |  |
| MSK: <input type="checkbox"/>                                                                                                                                                                                                                                                                                                                                                                                                                                                                                              |         |         |                                 |  |                               |  |                                |  |                              |  |                              |  |                                           |  |                                                                                                                                                                                                                                                                                                                                                                                                                                                  |        |         |                               |  |                                 |  |                                |  |                                         |  |                                             |  |
| Neuro: <input type="checkbox"/>                                                                                                                                                                                                                                                                                                                                                                                                                                                                                            |         |         |                                 |  |                               |  |                                |  |                              |  |                              |  |                                           |  |                                                                                                                                                                                                                                                                                                                                                                                                                                                  |        |         |                               |  |                                 |  |                                |  |                                         |  |                                             |  |
| Derm: <input type="checkbox"/>                                                                                                                                                                                                                                                                                                                                                                                                                                                                                             |         |         |                                 |  |                               |  |                                |  |                              |  |                              |  |                                           |  |                                                                                                                                                                                                                                                                                                                                                                                                                                                  |        |         |                               |  |                                 |  |                                |  |                                         |  |                                             |  |
| Mental Health: <input type="checkbox"/>                                                                                                                                                                                                                                                                                                                                                                                                                                                                                    |         |         |                                 |  |                               |  |                                |  |                              |  |                              |  |                                           |  |                                                                                                                                                                                                                                                                                                                                                                                                                                                  |        |         |                               |  |                                 |  |                                |  |                                         |  |                                             |  |
| Constitutional SX: <input type="checkbox"/>                                                                                                                                                                                                                                                                                                                                                                                                                                                                                |         |         |                                 |  |                               |  |                                |  |                              |  |                              |  |                                           |  |                                                                                                                                                                                                                                                                                                                                                                                                                                                  |        |         |                               |  |                                 |  |                                |  |                                         |  |                                             |  |

|                                                                                                                                                                                                                                                                                                                                                                                                                                                                                                                                                                                                                                                                                                                                                                                                                                                                                                                                                                                                                                                                                                                                                                                                                                                                                                                                                                                                                                |                                                                                                                                                                                                                                                                                                                                                                                                                                                                                                                                                                                                                                                                                                                                                                                |                                                                                                                                                                                                                                                                                                                                                                                                                                                                                                                                                                             |
|--------------------------------------------------------------------------------------------------------------------------------------------------------------------------------------------------------------------------------------------------------------------------------------------------------------------------------------------------------------------------------------------------------------------------------------------------------------------------------------------------------------------------------------------------------------------------------------------------------------------------------------------------------------------------------------------------------------------------------------------------------------------------------------------------------------------------------------------------------------------------------------------------------------------------------------------------------------------------------------------------------------------------------------------------------------------------------------------------------------------------------------------------------------------------------------------------------------------------------------------------------------------------------------------------------------------------------------------------------------------------------------------------------------------------------|--------------------------------------------------------------------------------------------------------------------------------------------------------------------------------------------------------------------------------------------------------------------------------------------------------------------------------------------------------------------------------------------------------------------------------------------------------------------------------------------------------------------------------------------------------------------------------------------------------------------------------------------------------------------------------------------------------------------------------------------------------------------------------|-----------------------------------------------------------------------------------------------------------------------------------------------------------------------------------------------------------------------------------------------------------------------------------------------------------------------------------------------------------------------------------------------------------------------------------------------------------------------------------------------------------------------------------------------------------------------------|
| <p style="writing-mode: vertical-rl; transform: rotate(180deg);">Education/<br/>Counseling</p> <h3>Behavioural</h3> <p><input type="checkbox"/> <i>adverse nutritional habits</i></p> <p><input type="checkbox"/> <i>dietary advice on fat/cholesterol (30-69 yrs)</i></p> <p><input type="checkbox"/> adequate calcium intake (1000 to 1500mg/d)</p> <p><input type="checkbox"/> adequate vitamin D (400 to 1000 IU /d)</p> <p><input type="checkbox"/> <i>regular, moderate physical activity</i></p> <p><input type="checkbox"/> <i>avoid sun exposure, use protective clothing</i></p> <p><input type="checkbox"/> <i>safe sex practices/STD counseling</i></p> <h3>Overweight (BMI 25-29) or Obese (BMI 30-39)</h3> <p><input type="checkbox"/> Yes <input type="checkbox"/> No</p> <p><input type="checkbox"/> <i>structured behavioural interventions for weight loss</i></p> <p><input type="checkbox"/> screen for mental illness if obese</p> <p><input type="checkbox"/> multidisciplinary approach</p> <h3>Smoking</h3> <p><input type="checkbox"/> Yes <input type="checkbox"/> No</p> <p><input type="checkbox"/> <b>smoking cessation</b></p> <p><input type="checkbox"/> <b>nicotine replacement therapy/other drugs</b></p> <p><input type="checkbox"/> <i>dietary advice on fruits and green leafy vegetables</i></p> <p><input type="checkbox"/> <i>referral to validated smoking cessation program</i></p> | <p><b>Alcohol</b>      <input type="checkbox"/> Yes <input type="checkbox"/> No</p> <p><input type="checkbox"/> <i>case finding for problem drinking</i></p> <p><input type="checkbox"/> <i>counseling for problem drinking</i></p> <p><b>Elderly</b>      <input type="checkbox"/> Yes <input type="checkbox"/> No</p> <p><input type="checkbox"/> <b>cognitive assessment</b> (if concerns)</p> <p><input type="checkbox"/> <b>fall assessment</b> (if history of falls)</p> <p><b>Oral Hygiene</b></p> <p><input type="checkbox"/> <b>brushing/flossing teeth</b></p> <p><input type="checkbox"/> <b>fluoride (toothpaste/supplement)</b></p> <p><input type="checkbox"/> <i>tooth scaling and prophylaxis</i></p> <p><input type="checkbox"/> <b>smoking cessation</b></p> | <h3>Personal Safety</h3> <p><input type="checkbox"/> <b>hearing protection</b></p> <p><input type="checkbox"/> <b>noise control programs</b></p> <p><input type="checkbox"/> <b>seat belts</b></p> <p><b>Parents with children</b>      <input type="checkbox"/> Yes <input type="checkbox"/> No</p> <p><input type="checkbox"/> <i>poison control prevention</i></p> <p><input type="checkbox"/> <i>smoke detectors</i></p> <p><input type="checkbox"/> <i>non-flammable sleepwear</i></p> <p><input type="checkbox"/> <i>hot water thermostat settings (&lt;54°C)</i></p> |
|--------------------------------------------------------------------------------------------------------------------------------------------------------------------------------------------------------------------------------------------------------------------------------------------------------------------------------------------------------------------------------------------------------------------------------------------------------------------------------------------------------------------------------------------------------------------------------------------------------------------------------------------------------------------------------------------------------------------------------------------------------------------------------------------------------------------------------------------------------------------------------------------------------------------------------------------------------------------------------------------------------------------------------------------------------------------------------------------------------------------------------------------------------------------------------------------------------------------------------------------------------------------------------------------------------------------------------------------------------------------------------------------------------------------------------|--------------------------------------------------------------------------------------------------------------------------------------------------------------------------------------------------------------------------------------------------------------------------------------------------------------------------------------------------------------------------------------------------------------------------------------------------------------------------------------------------------------------------------------------------------------------------------------------------------------------------------------------------------------------------------------------------------------------------------------------------------------------------------|-----------------------------------------------------------------------------------------------------------------------------------------------------------------------------------------------------------------------------------------------------------------------------------------------------------------------------------------------------------------------------------------------------------------------------------------------------------------------------------------------------------------------------------------------------------------------------|

**Disclaimer:** This form is a guide to the adult periodic health examination. Last updated February 2015. The recommendations are for average-risk adults.

Endorsed by:  
 The College of Family Physicians of Canada  
 Le Collège des médecins de famille du Canada

**Please note:**

**Bold** = Grade A, or strong evidence (from the Canadian Task Force on Preventive Health Care)

*Italics* = Grade B, or weak evidence (from the Canadian Task Force on Preventive Health Care)

Plain text = Guidelines (from other Canadian sources)

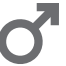

Name:

**Physical Examination**

**BP:**                    **HT:**                    **WT:**                    **BMI:**

| Age                 | ≤ 64 years                                                                                                                                                                                                                                                                                                                                                                                                                                                                            | ≥ 65 years                                                                                                                                                                                                                                                                                                                                                                                                                                                                                                                             |
|---------------------|---------------------------------------------------------------------------------------------------------------------------------------------------------------------------------------------------------------------------------------------------------------------------------------------------------------------------------------------------------------------------------------------------------------------------------------------------------------------------------------|----------------------------------------------------------------------------------------------------------------------------------------------------------------------------------------------------------------------------------------------------------------------------------------------------------------------------------------------------------------------------------------------------------------------------------------------------------------------------------------------------------------------------------------|
| Labs/Investigations | <input type="checkbox"/> <b>Hemoccult multiphase q1-2 yrs</b> (≥50 yrs)<br>OR <input type="checkbox"/> <i>Sigmoidoscopy</i> OR <input type="checkbox"/> Colonoscopy<br><input type="checkbox"/> <b>Gonorrhea/Chlamydia/Syphilis/HIV/HSV/HCV</b> screen (high risk)<br><input type="checkbox"/> Fasting Lipid Profile q1-5 yrs (≥40 yrs or sooner if at risk)<br><input type="checkbox"/> <i>A1C or FPG if at risk</i><br><input type="checkbox"/> Bone Mineral Density if at risk     | <input type="checkbox"/> <b>Hemoccult Multiphase q1-2 yrs</b> (up to 74 yrs)<br>OR <input type="checkbox"/> <i>Sigmoidoscopy</i> OR <input type="checkbox"/> Colonoscopy<br><input type="checkbox"/> <b>Gonorrhea/Chlamydia/Syphilis/HIV/HSV/HCV</b> screen (high risk)<br><input type="checkbox"/> <i>Audioscope (or inquire/whispered voice test)</i><br><input type="checkbox"/> Fasting Lipid Profile q1-5 yrs (≤75 yrs)<br><input type="checkbox"/> <i>A1C or FPG if at risk</i><br><input type="checkbox"/> Bone Mineral Density |
| Immunizations       | <input type="checkbox"/> <b>Tetanus vaccine q10 yrs</b> <input type="checkbox"/> Meningococcal vaccine<br><input type="checkbox"/> <b>Influenza vaccine q1 yr</b> <input type="checkbox"/> Herpes zoster vaccine (≥60 yrs)<br><input type="checkbox"/> Acellular pertussis vaccine<br><input type="checkbox"/> Varicella vaccine (2 doses)<br><input type="checkbox"/> Human papillomavirus vaccine (≤26 yrs of age or msm)<br><input type="checkbox"/> Measles/Mumps/Rubella vaccine | <input type="checkbox"/> <b>Tetanus vaccine q10 yrs</b><br><input type="checkbox"/> <b>Influenza vaccine q1 yr</b> <input type="checkbox"/> Herpes zoster vaccine<br><input type="checkbox"/> Pneumococcal vaccine<br><input type="checkbox"/> Acellular pertussis vaccine<br><input type="checkbox"/> Varicella vaccine (2 doses)                                                                                                                                                                                                     |

**Assessment and Plans**

**Date:**

**Signature:**

**References:** See explanation sheet for references and recommendations.

**Disclaimer:** This form is a guide to the adult periodic health examination. Last updated February 2015. The recommendations are for average-risk adults.

Endorsed by:

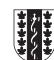

The College of Family Physicians of Canada

Le Collège des médecins de famille du Canada
